# Supplementary material
Source: PubMed Central journal article supplement (PMC3020736)
Supplement: supp_M110.172874_jbc.M110.172874-1.pdf [file supp_M110.172874_jbc.M110.172874-1.pdf]

**Figure S1.**

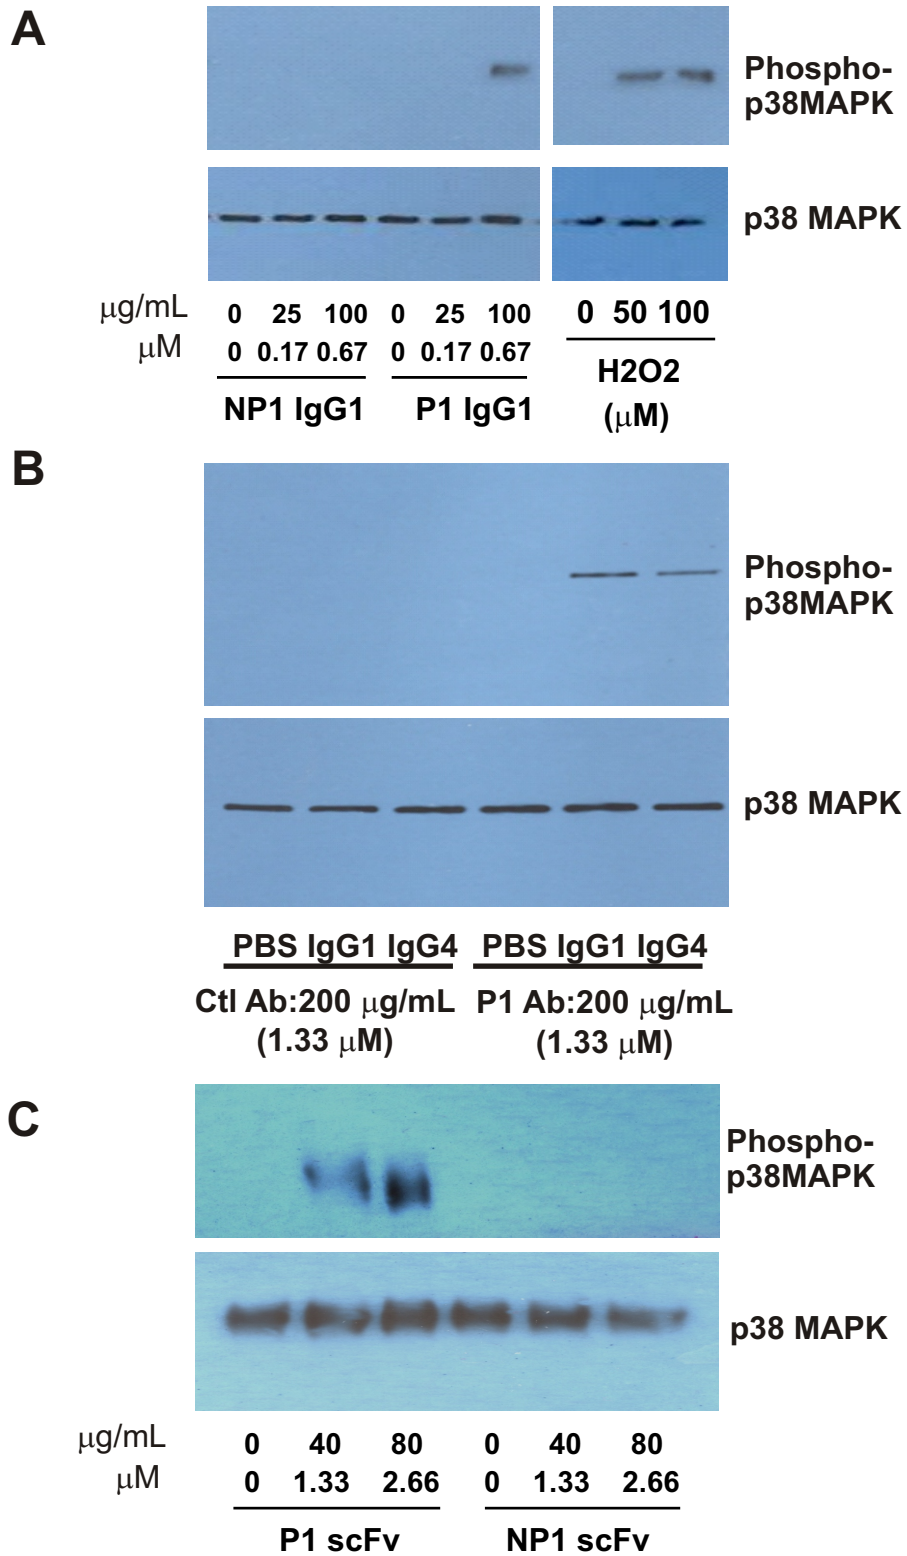

**Figure S2.**

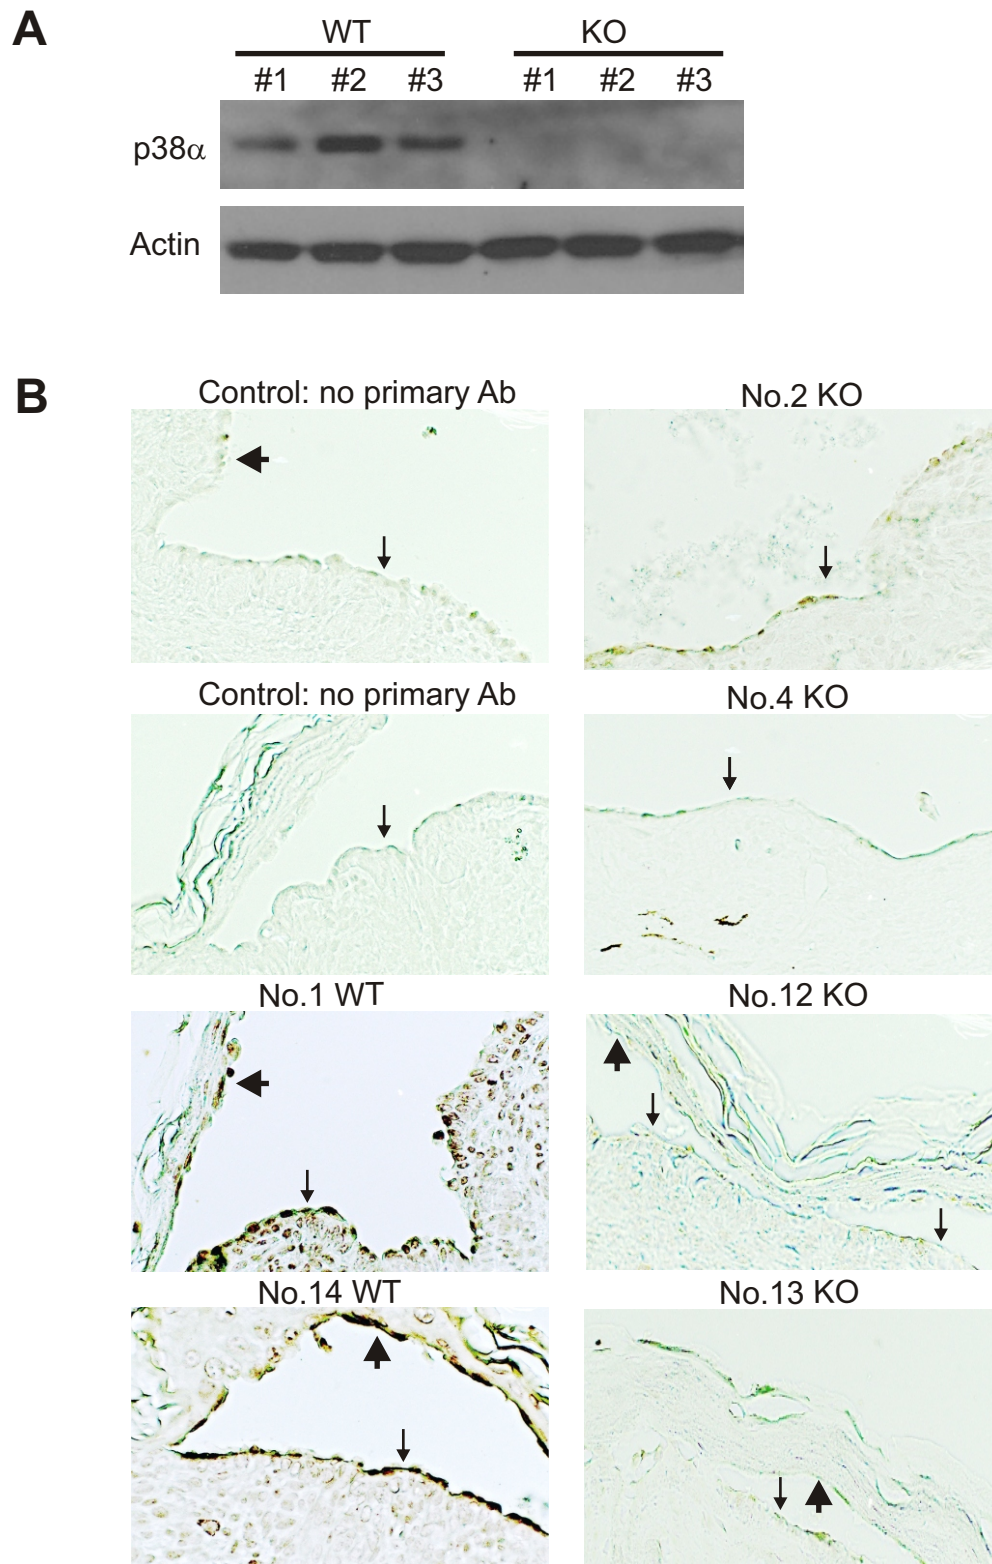

**Figure S3.**

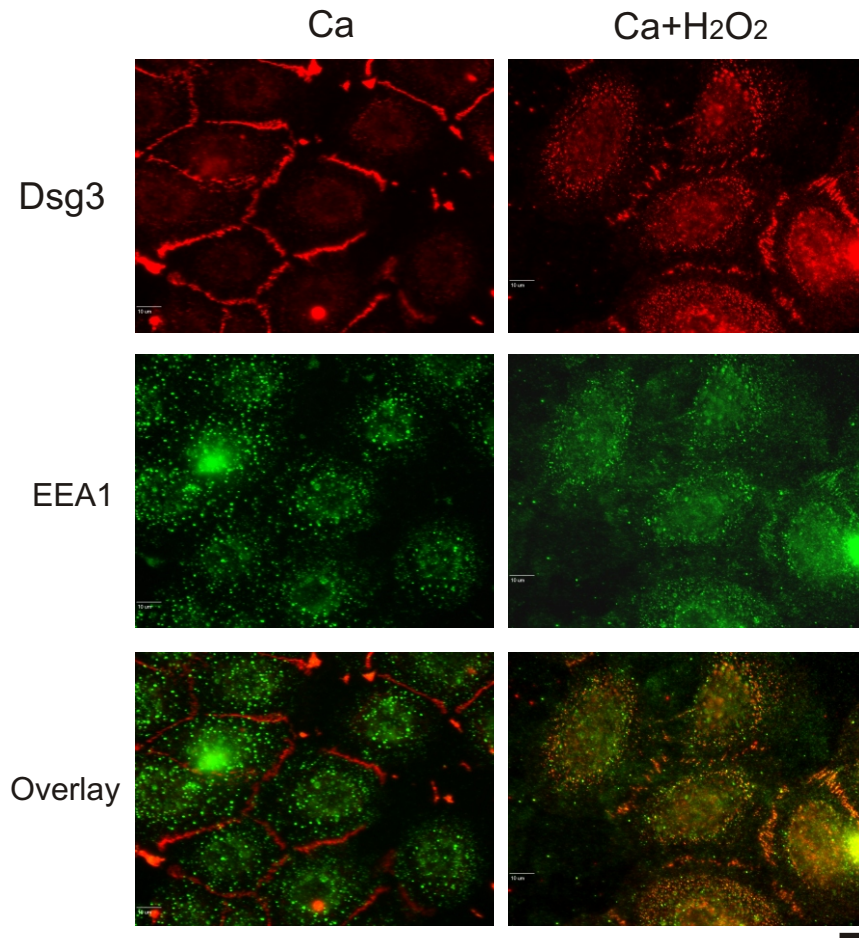

**Figure S4.**

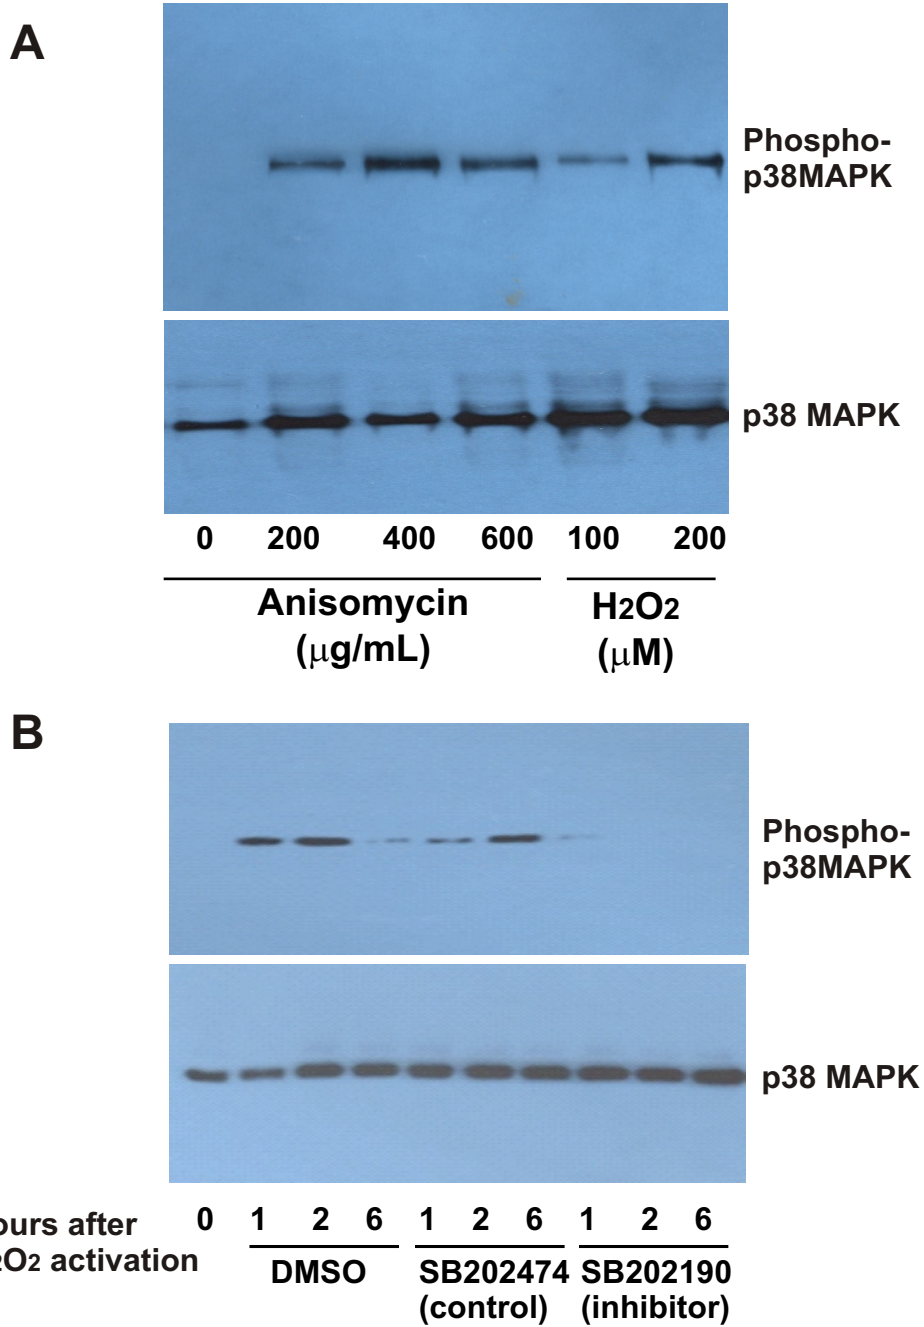

Table S1.

| PV mAb     |     | Dsg1 | Dsg3      | Dsc3 | E-cad |
|------------|-----|------|-----------|------|-------|
| (D31)2/29  | P1  | +    | +         | -    | -     |
| (D3)3c/9   | P2  | +/-  | + (1-88)  | -    | -     |
| (D31)2/28  | P3  | +    | +         | -    | -     |
| (D31)12b/6 | NP1 | +    | +         | -    | -     |
| (D3)1d/2c) | NP2 | -    | + (1-161) | -    | -     |
| AK23       |     | -    | +         | ND   | ND    |

Table S2.

| Mouse | Phenotype | Injection | Dose ( $\mu\text{g}$ ) | Gross blister | Histologic blister | serum Dsg3 ELISA value (U/mL) |
|-------|-----------|-----------|------------------------|---------------|--------------------|-------------------------------|
| 17    | KO        | NP2       | 40                     | -             | -                  | 163                           |
| 18    | KO        | NP2       | 40                     | -             | -                  | 183                           |
| 15    | WT        | NP2       | 40                     | -             | -                  | 178                           |
| 19    | WT        | NP2       | 40                     | -             | -                  | 166                           |
| 20    | WT        | NP2       | 40                     | -             | -                  | 158                           |
| 2     | KO        | P1        | 40                     | +             | +++                | 32                            |
| 4     | KO        | P1        | 40                     | +             | +++                | 32                            |
| 10    | KO        | P1        | 40                     | +             | +++                | 32                            |
| 1     | WT        | P1        | 40                     | +             | +++                | 17                            |
| 3     | WT        | P1        | 40                     | +             | +++                | 33                            |
| 9     | WT        | P1        | 40                     | +             | +++                | 31                            |
| 11    | WT        | P1        | 40                     | +             | ++                 | 23                            |
| 21    | WT        | P1        | 40                     | +             | +++                | 34                            |
| 12    | KO        | P1        | 20                     | +             | +++                | 19                            |
| 13    | KO        | P1        | 20                     | +             | ++                 | 19                            |
| 30    | KO        | P1        | 20                     | +             | +++                | 22                            |
| 5     | WT        | P1        | 20                     | +             | +++                | 24                            |
| 6     | WT        | P1        | 20                     | -             | -                  | 24                            |
| 8     | WT        | P1        | 20                     | +             | +++                | 19                            |
| 14    | WT        | P1        | 20                     | +             | ++                 | 21                            |
| 29    | WT        | P1        | 20                     | +             | +                  | 15                            |
| 22    | KO        | P1        | 10                     | +             | ++                 | 10                            |
| 23    | KO        | P1        | 10                     | -             | +                  | 10                            |
| 24    | KO        | P1        | 10                     | +             | ++                 | 6                             |
| 28    | KO        | P1        | 10                     | +             | +++                | 10                            |
| 25    | WT        | P1        | 10                     | -             | ++                 | 8                             |
| 26    | WT        | P1        | 10                     | -             | +                  | 8                             |
| 27    | WT        | P1        | 10                     | -             | +                  | 9                             |
